# Supplementary material for: Surface Engineered Iron Oxide Nanoparticles Generated by Inert Gas Condensation for Biomedical Applications
Source: PubMed Central journal article supplement (PMC8001625; doi:10.3390/bioengineering8030038), 2021-03-15
Supplement: bioengineering-08-00038-s001.pdf [file bioengineering-08-00038-s001.pdf]

# Surface Engineered Iron Oxide Nanoparticles Prepared by Inert Gas Condensation for Biomedical Applications

Aver Hemben, Iva Chianella and Glenn John Thomas Leighton \*

Surface Engineering and Precision Institute, Cranfield University, Bedfordshire, UK;

a.hemben@cranfield.ac.uk; i.chianella.1998@cranfield.ac.uk; g.j.t.leighton@cranfield.ac.uk

## Supporting Information

\*Correspondence: g.j.t.leighton@cranfield.ac.uk

Scheme S1

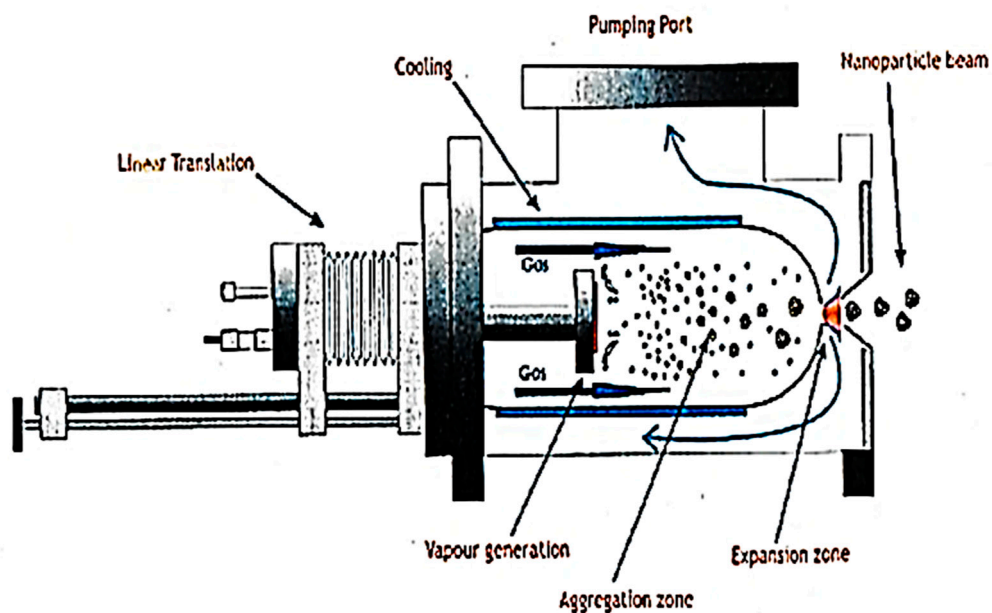

Scheme S1: Production of IONPs by inert gas condensation [33]

Figure S1.

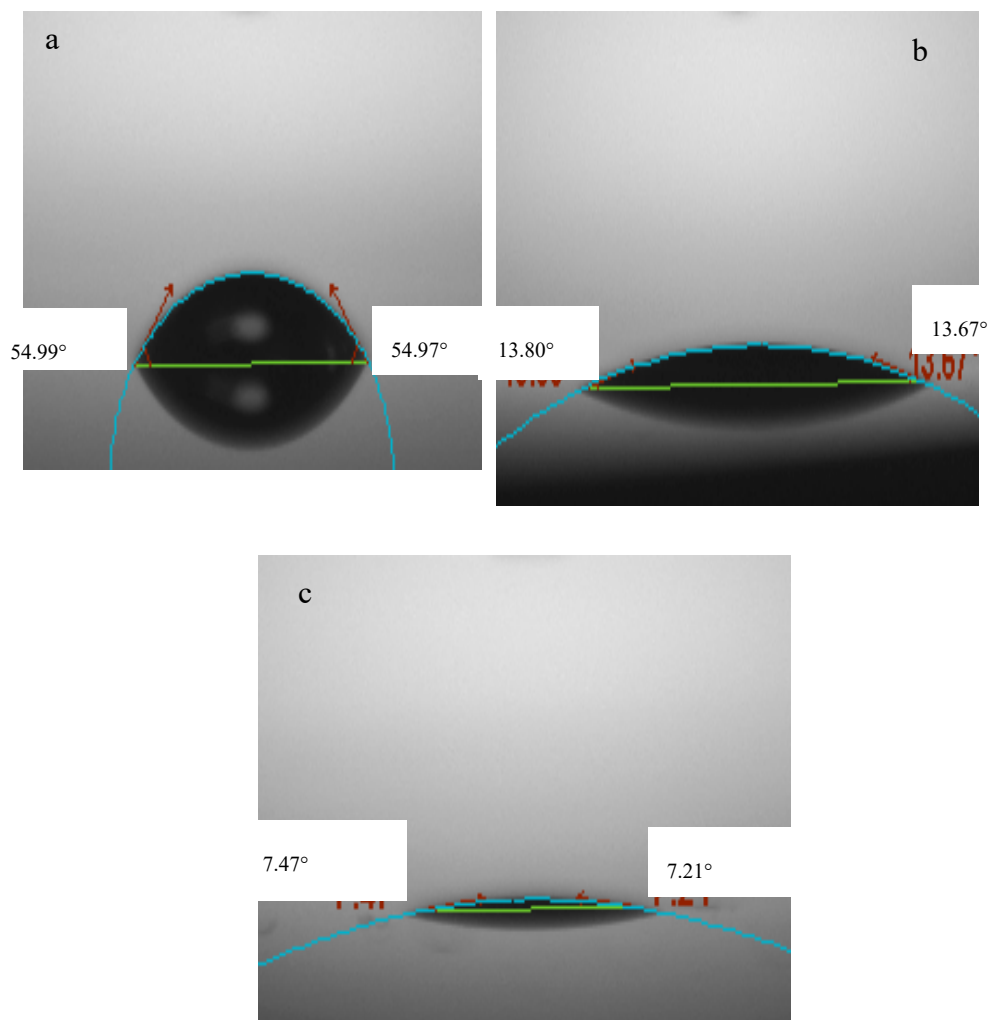

Figure S1: Contact angle measurement bare silicon wafer (a) PEG-coated wafer (b) IONPs deposited on PEG coated wafer (c).

Figure S2.

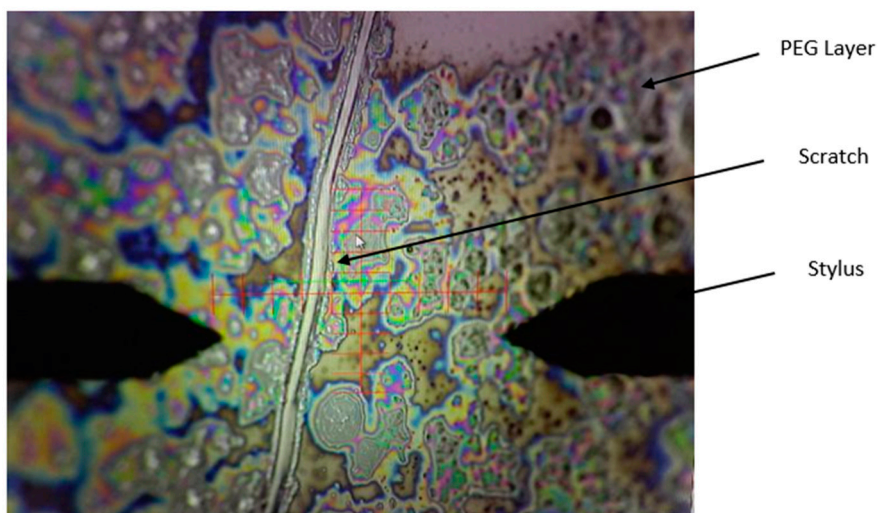

Figures S2. Scratched PEG-coated silicon wafer

Table S1

Table S1: Conditions tested to produce IONPs using the Mantis NanoGene Trio system.

| Main chamber pressure (Torr) | Temperature (°c) | WD (cm) | Throttle position (%) |
|------------------------------|------------------|---------|-----------------------|
| $2.84 \cdot 10^{-5}$         | 17               | 13.8    | 0                     |
| $7.36 \cdot 10^{-4}$         | 16               | 13.8    | 50                    |
| $1.32 \cdot 10^{-3}$         | 16               | 13.8    | 70                    |

Table S2

*Table S2: Mantis NanoGene Trio system parameters adjustment to achieve and maintain a plasma.*

| t <sub>0</sub> minutes |          | t <sub>30</sub> minutes |          | t <sub>60</sub> minutes |          | t <sub>90</sub> minutes |          | t <sub>120</sub> minutes |          |
|------------------------|----------|-------------------------|----------|-------------------------|----------|-------------------------|----------|--------------------------|----------|
| Volts (V)              | Amps (A) | Volts (V)               | Amps (A) | Volts (V)               | Amps (A) | Volts (V)               | Amps (A) | Volts (V)                | Amps (A) |
| 454.0                  | 0.110    | 455.0                   | 0.110    | 456.0                   | 0.109    | 438.0                   | 0.109    | 458.0                    | 0.103    |
| 459.7                  | 0.109    | 404.5                   | 0.108    | 456.0                   | 0.107    | 468.0                   | 0.107    | 468.0                    | 0.107    |
| 460.0                  | 0.109    | 465.4                   | 0.106    | 467.0                   | 0.106    | 461.1                   | 0.107    | 463.0                    | 0.109    |
| 468.0                  | 0.107    | 466.5                   | 0.107    | 468.0                   | 0.107    | 467.0                   | 0.101    | 466                      | 0.107    |
| 458.5                  | 0.114    | 472.1                   | 0.114    | 488.0                   | 0.110    | 488.0                   | 0.100    | 487.0                    | 0.110    |
| 492.1                  | 0.100    | 490.0                   | 0.100    | 492.3                   | 0.100    | 491.2                   | 0.100    | 493.5                    | 0.100    |
| 531.9                  | 0.038    | 531.6                   | 0.030    | 529.0                   | 0.030    | 528.3                   | 0.030    | 524.2                    | 0.031    |

Table S3

*Table S3: Changes on the flow rate of argon in relation to the power and throttle position.*

| Throttle position (%) | WD (cm) | Argon flow (sccm) | Average power (Watts) |
|-----------------------|---------|-------------------|-----------------------|
| 50                    | 13.8    | 30                | 49.95                 |
| 70                    | 13.8    | 70                | 49.2                  |
| 80                    | 13.8    | 100               | 41.2                  |
